# Supplementary material
Source: PubMed Central journal article supplement (PMC6749538)

## Supplementary Online Content

Cespedes Feliciano EM, Rifas-Shiman SL, Quante M, Redline S, Oken E, Taveras EM. Chronotype, social jet lag, and cardiometabolic risk factors in early adolescence. *JAMA Pediatr*. Published online September 16, 2019. doi:10.1001/jamapediatrics.2019.3089

**eTable 1.** Individual Questionnaire Items on the Adapted Morningness-Eveningness Scale: Descriptive Statistics by Sex

**eTable 2.** Weekly Sleep Patterns, Chronotype, and Social Jetlag

**eTable 3.** Sleep Characteristics by Chronotype and Sex

**eTable 4.** Associations of Sleep Characteristics with Overweight and Obesity by Sex

**eFigure.** Participants in Project Viva Analyses of Social Jetlag, Chronotype, and Cardiometabolic Health

This supplementary material has been provided by the authors to give readers additional information about their work.

| <b>eTable 1. Individual Questionnaire Items on the Adapted Morningness-Eveningness Scale: Descriptive Statistics by Sex</b> |                |              |             |
|-----------------------------------------------------------------------------------------------------------------------------|----------------|--------------|-------------|
|                                                                                                                             | <b>Overall</b> | <b>Girls</b> | <b>Boys</b> |
|                                                                                                                             | n=804          | n=418        | n=386       |
|                                                                                                                             | <b>N (%)</b>   |              |             |
| <b>1. Imagine: School is canceled! You can get up whenever you want to. When would you get out of bed? Between...</b>       |                |              |             |
| 1. 5:00 and 6:30 am                                                                                                         | 23 (2.9)       | 3 (0.7)      | 20 (5.2)    |
| 2. 6:30 and 7:45 am                                                                                                         | 105 (13.1)     | 36 (8.6)     | 69 (17.9)   |
| 3. 7:45 and 9:45 am                                                                                                         | 362 (45.0)     | 194 (46.4)   | 168 (43.5)  |
| 4. 9:45 and 11:00 am                                                                                                        | 245 (30.5)     | 137 (32.8)   | 108 (28.0)  |
| 5. After 11:00 am                                                                                                           | 69 (8.6)       | 48 (11.5)    | 21 (5.4)    |
| <b>2. Is it easy for you to get up in the morning?</b>                                                                      |                |              |             |
| 1. No way!                                                                                                                  | 122 (15.2)     | 63 (15.1)    | 59 (15.3)   |
| 2. Sort of                                                                                                                  | 338 (42.0)     | 191 (45.7)   | 147 (38.1)  |
| 3. Pretty easy                                                                                                              | 292 (36.3)     | 143 (34.2)   | 149 (38.6)  |
| 4. It's a cinch                                                                                                             | 52 (6.5)       | 21 (5.0)     | 31 (8.0)    |
| <b>3. When do you have the most energy to do your favorite things?</b>                                                      |                |              |             |
| 1. Morning! I'm tired in the evening                                                                                        | 40 (5.0)       | 16 (3.8)     | 24 (6.2)    |
| 2. Morning more than evening                                                                                                | 148 (18.4)     | 75 (17.9)    | 73 (18.9)   |
| 3. Evening more than morning                                                                                                | 432 (53.7)     | 237 (56.7)   | 195 (50.5)  |
| 4. Evening! I'm tired in the morning                                                                                        | 184 (22.9)     | 90 (21.5)    | 94 (24.4)   |
| <b>4. When does your body start to tell you it's time to go to bed (even if you ignore it)? Between...</b>                  |                |              |             |
| 1. 8:00 and 9:00 pm                                                                                                         | 93 (11.6)      | 54 (12.9)    | 39 (10.1)   |
| 2. 9:00 and 10:15 pm                                                                                                        | 328 (40.8)     | 181 (43.3)   | 147 (38.1)  |
| 3. 10:15 pm and 12:30 am                                                                                                    | 310 (38.6)     | 150 (35.9)   | 160 (41.5)  |
| 4. 12:30 and 1:45 am                                                                                                        | 53 (6.6)       | 26 (6.2)     | 27 (7.0)    |
| 5. 1:45 and 3:00 am                                                                                                         | 20 (2.5)       | 7 (1.7)      | 13 (3.4)    |
| <b>5. Guess what? Your parents have decided to let you set your own bedtime. What time would you pick? Between...</b>       |                |              |             |
| 1. 8:00 and 9:00 pm                                                                                                         | 59 (7.3)       | 38 (9.1)     | 21 (5.4)    |
| 2. 9:00 and 10:15 pm                                                                                                        | 332 (41.3)     | 192 (45.9)   | 140 (36.3)  |
| 3. 10:15 pm and 12:30 am                                                                                                    | 328 (40.8)     | 150 (35.9)   | 178 (46.1)  |
| 4. 12:30 and 1:45 am                                                                                                        | 55 (6.8)       | 27 (6.5)     | 28 (7.3)    |
| 5. 1:45 and 3:00 am                                                                                                         | 30 (3.7)       | 11 (2.6)     | 19 (4.9)    |

| <b>eTable 2. Weekly Sleep Patterns, Chronotype, and Social Jetlag<sup>1,2,3</sup></b> |             |              |            |            |                  |                   |                           |                         |                           |
|---------------------------------------------------------------------------------------|-------------|--------------|------------|------------|------------------|-------------------|---------------------------|-------------------------|---------------------------|
| Sleep duration                                                                        | Sleep onset | Sleep offset | Total      | Female     | Social Jetlag    | Social Jetlag >2h | Strong Evening Preference | Intermediate Preference | Strong Morning Preference |
|                                                                                       |             |              | N (%)      | N (%)      | Median (IQR)     | N (%)             | N (%)                     | N (%)                   | N (%)                     |
| WE > WD                                                                               | WE ≥WD      | WD ≤ WE      | 388 (48.4) | 222 (57.2) | 1.3 (0.8-1.9)    | 79 (20.4)         | 95 (24.5)                 | 207 (53.4)              | 86 (22.2)                 |
| WE < WD                                                                               | WE ≥WD      | WD ≤ WE      | 167 (20.8) | 61 (36.5)  | 1.1 (0.6-1.7)    | 29 (17.4)         | 34 (20.4)                 | 87 (52.1)               | 46 (27.5)                 |
| WE > WD                                                                               | WE < WD     | WD ≤ WE      | 124 (15.5) | 71 (57.3)  | 0.4 (0.1-0.7)    | 1 (0.8)           | 27 (21.8)                 | 65 (52.4)               | 32 (25.8)                 |
| WE < WD                                                                               | WE ≥ WD     | WD > WE      | 56 (7.0)   | 29 (51.8)  | 0.1 (-0.2-0.3)   | 1 (1.8)           | 13 (23.2)                 | 30 (53.6)               | 13 (23.2)                 |
| WE < WD                                                                               | WE < WD     | WD > WE      | 27 (3.4)   | 15 (55.6)  | -0.7 (-0.9--0.4) | 0 (0.0)           | 8 (29.6)                  | 13 (48.1)               | 6 (22.2)                  |
| WE > WD                                                                               | WE < WD     | WD > WE      | 26 (3.2)   | 13 (50.0)  | -0.7 (-1.0--0.4) | 0 (0.0)           | 6 (23.1)                  | 17 (65.4)               | 3 (11.5)                  |
| WE > WD                                                                               | WE ≥WD      | WD > WE      | 7 (0.9)    | 3 (42.9)   | -0.0 (-0.1-0.2)  | 0 (0.0)           | 5 (71.4)                  | 2 (28.6)                | 0 (0.0)                   |
| WE < WD                                                                               | WE < WD     | WD ≤ WE      | 7 (0.9)    | 3 (42.9)   | 0.0 (-0.2-0.2)   | 0 (0.0)           | 2 (28.6)                  | 4 (57.1)                | 1 (14.3)                  |

WE: Weekend; WD: Weekday

<sup>1</sup> Social jetlag is computed as the difference in average sleep midpoint on weekend days minus the average sleep midpoint on weekdays in hours

<sup>2</sup> Morningness-Eveningness scales are derived from five questions regarding adolescents' preferences for when to get into bed and out of bed, what time of day they had the most energy and how easy it was to get up in the morning; here the extreme quintiles were categorized as strong evening and morning preferences, respectively, while the middle three quintiles were designated as intermediate preference

<sup>3</sup> All cells represent row percentages other than column headings, which represent column percentages

| <b>eTable 3. Sleep Characteristics by Chronotype and Sex<sup>1,2</sup></b> |         |                      |       |              |                      |       |         |                      |       |
|----------------------------------------------------------------------------|---------|----------------------|-------|--------------|----------------------|-------|---------|----------------------|-------|
|                                                                            | Evening |                      |       | Intermediate |                      |       | Morning |                      |       |
|                                                                            | Median  | Inter-quartile range |       | Median       | Inter-quartile range |       | Median  | Inter-quartile range |       |
| <b>Girls</b>                                                               |         |                      |       |              |                      |       |         |                      |       |
| Social jetlag, hours                                                       | 1.1     | 0.4                  | 1.9   | 0.9          | 0.4                  | 1.5   | 0.8     | 0.3                  | 1.5   |
| Sleep duration, hours                                                      | 7.2     | 6.8                  | 7.8   | 7.5          | 7.1                  | 7.8   | 7.8     | 7.2                  | 8.1   |
| Sleep midpoint on weekends, time                                           | 4:55    | 3:58                 | 5:48  | 4:05         | 3:27                 | 4:47  | 3:43    | 2:56                 | 4:13  |
| Sleep midpoint on weekdays, time                                           | 3:30    | 2:54                 | 4:41  | 2:54         | 2:25                 | 3:47  | 2:35    | 2:08                 | 3:12  |
| Sleep onset on weekends, time                                              | 2:39    | 0:32                 | 23:04 | 22:30        | 1:28                 | 23:12 | 22:33   | 21:43                | 23:14 |
| Sleep onset on weekdays, time                                              | 22:27   | 1:35                 | 23:13 | 22:28        | 21:49                | 23:06 | 22:02   | 21:32                | 22:33 |
| <b>Boys</b>                                                                |         |                      |       |              |                      |       |         |                      |       |
| Social jetlag, hours                                                       | 1.0     | 0.4                  | 1.9   | 0.8          | 0.3                  | 1.4   | 0.6     | 0.3                  | 1.2   |
| Sleep duration, hours                                                      | 7.2     | 6.6                  | 7.7   | 7.1          | 6.7                  | 7.6   | 7.3     | 6.8                  | 7.6   |
| Sleep midpoint on weekends, time                                           | 4:29    | 3:54                 | 5:29  | 3:55         | 3:20                 | 4:52  | 3:15    | 2:42                 | 3:56  |
| Sleep midpoint on weekdays, time                                           | 3:26    | 2:45                 | 4:27  | 2:59         | 2:24                 | 3:49  | 2:32    | 1:57                 | 3:07  |
| Sleep onset on weekends, time                                              | 22:06   | 1:12                 | 23:22 | 22:24        | 1:43                 | 23:13 | 22:25   | 21:16                | 22:56 |
| Sleep onset on weekdays, time                                              | 22:21   | 1:27                 | 23:09 | 22:22        | 21:29                | 22:53 | 22:05   | 21:24                | 22:43 |

<sup>1</sup> Social jetlag is computed as the difference in average sleep midpoint on weekend days minus the average sleep midpoint on weekdays in hours

<sup>2</sup> Morningness-Eveningness scales are derived from five questions regarding adolescents' preferences for when to get into bed and out of bed, what time of day they had the most energy and how easy it was to get up in the morning; here the extreme quintiles were categorized as strong evening and morning preferences, respectively, while the middle three quintiles were designated as intermediate preference

**eTable 4. Associations of Sleep Characteristics with Overweight and Obesity by Sex<sup>1,2,3</sup>**

|                                                   | Girls                                       |                           |                   | Boys                   |                           |                   |
|---------------------------------------------------|---------------------------------------------|---------------------------|-------------------|------------------------|---------------------------|-------------------|
| BMI percentile category                           | Normal-weight<br><85th                      | Overweight<br>85th -<95th | Obese<br>≥95th    | Normal-weight<br><85th | Overweight<br>85th -<95th | Obese<br>≥95th    |
|                                                   | n=302                                       | n=69                      | n=47              | n=281                  | n=53                      | n=52              |
| <b><i>Sleep characteristics</i></b>               | <b>Median (IQR)</b>                         |                           |                   |                        |                           |                   |
| Actigraphy sleep duration, hours/day              | 7.6 (7.2-7.9)                               | 7.4 (7.0-7.9)             | 7.1 (6.8-7.8)     | 7.3 (6.8-7.7)          | 7.0 (6.6-7.2)             | 7.0 (6.6-7.6)     |
| Social Jetlag, hours                              | 0.9 (0.3-1.6)                               | 0.9 (0.4-1.5)             | 1.0 (0.6-2.0)     | 0.8 (0.3-1.4)          | 0.8 (0.3-1.4)             | 1.2 (0.4-1.8)     |
| Chronotype preference                             | <b>N (%)</b>                                |                           |                   |                        |                           |                   |
| Evening                                           | 64 (21.2)                                   | 19 (27.5)                 | 18 (38.3)         | 62 (22.1)              | 15 (28.3)                 | 13 (25.0)         |
| Intermediate                                      | 164 (54.3)                                  | 35 (50.7)                 | 22 (46.8)         | 155 (55.2)             | 24 (45.3)                 | 26 (50.0)         |
| Morning                                           | 74 (24.5)                                   | 15 (21.7)                 | 7 (14.9)          | 64 (22.8)              | 14 (26.4)                 | 13 (25.0)         |
| <b><i>Multivariable adjusted associations</i></b> | <b>Odds Ratio (95% Confidence Interval)</b> |                           |                   |                        |                           |                   |
| Per hour social jetlag                            | 1.0 (ref)                                   | 1.01 (0.72, 1.40)         | 1.62 (1.02, 2.56) | 1.0 (ref)              | 0.81 (0.56, 1.18)         | 1.24 (0.88, 1.73) |
| Evening preference                                | 1.0 (ref)                                   | 1.01 (0.88, 1.16)         | 1.13 (0.95, 1.34) | 1.0 (ref)              | 1.03 (0.89, 1.20)         | 1.09 (0.93, 1.27) |

<sup>1</sup> Social jetlag is computed as the difference in average sleep midpoint on weekend days minus the average sleep midpoint on weekdays in hours

<sup>2</sup> Morningness-Eveningness scales are derived from five questions regarding adolescents' preferences for when to get into bed and out of bed, what time of day they had the most energy and how easy it was to get up in the morning; here the extreme quintiles were categorized as strong evening and morning preferences, respectively, while the middle three quintiles were designated as intermediate preference

<sup>3</sup> Models adjust for adolescent age, race/ethnicity, pubertal status, season of measurement, parental socioeconomic status, actigraphy-measured sleep duration, parent-report of adolescent physical activity, and adolescent report of TV-viewing and indicators of diet quality (weekly consumption of sugary drinks and fast food)

**eFigure.** Participants in Project Viva Analyses of Social Jetlag, Chronotype, and Cardiometabolic Health

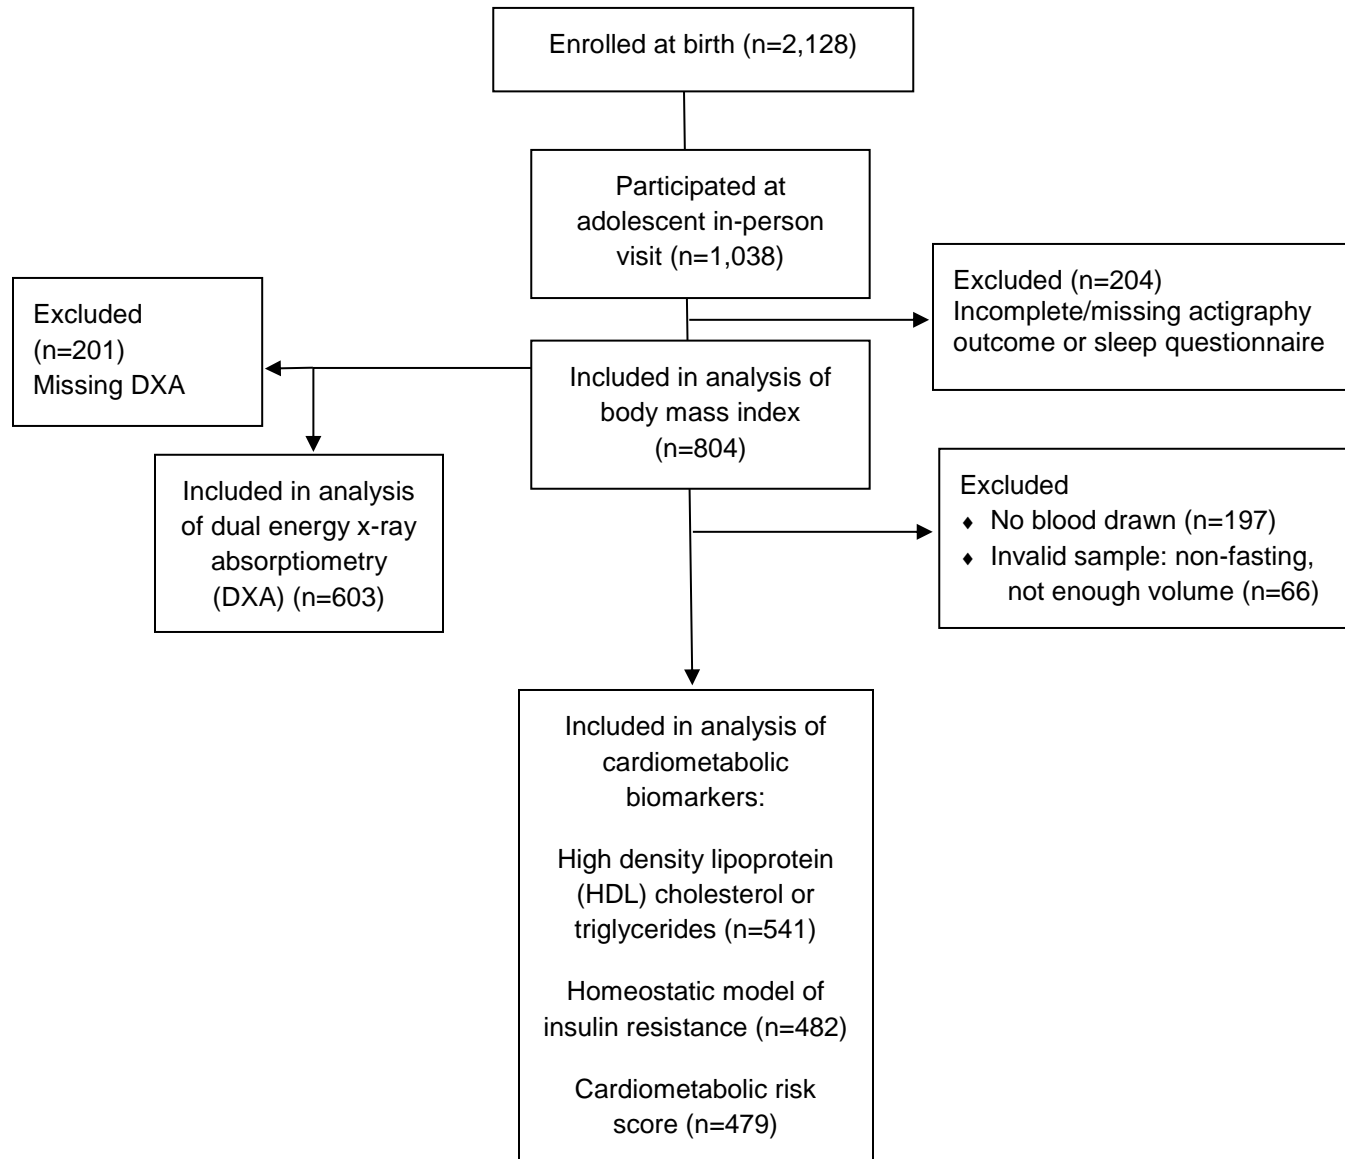

Supplement: jamapediatr-173-1049-s001.pdf [file jamapediatr-173-1049-s001.pdf]
